# Supplementary material for: Catalytic polymer self-cleavage for CO2 generation before combustion empowers materials with fire safety
Source: PubMed Central journal article supplement (PMC10978860; doi:10.1038/s41467-024-46756-0), 2024-03-28
Supplement: 41467_2024_46756_MOESM1_ESM.pdf [file 41467_2024_46756_MOESM1_ESM.pdf]

---

## Supplementary Information

### **Catalytic Polymer Self-Cleavage for CO<sub>2</sub> Generation Before Combustion Empowers Materials with Fire Safety**

Wei Luo<sup>1</sup>, Ming-Jun Chen<sup>1, ✉</sup>, Ting Wang<sup>1</sup>, Jin-Feng Feng<sup>1</sup>, Zhi-Cheng Fu<sup>1</sup>, Jin-Ni Deng<sup>1</sup>, Yuan-Wei Yan<sup>2</sup>, Yu-Zhong Wang<sup>3</sup>, Hai-Bo Zhao<sup>3, ✉</sup>

<sup>1</sup> Green Preparation and Recycling Laboratory of Functional Polymeric Materials, College of Science, Xihua University, Chengdu, Sichuan, 610039, China

<sup>2</sup> Zhuzhou Times New Material Technology Co., Ltd., Zhuzhou 412007, China

<sup>3</sup> The Collaborative Innovation Center for Eco-Friendly and Fire-Safety Polymeric Materials, National Engineering Laboratory of Eco-Friendly Polymeric Materials (Sichuan), State Key Laboratory of Polymer Materials Engineering, College of Chemistry, Sichuan University, Chengdu, Sichuan, 610064, China

✉ Email: [cmjchem@126.com](mailto:cmjchem@126.com); [haibor7@163.com](mailto:haibor7@163.com)

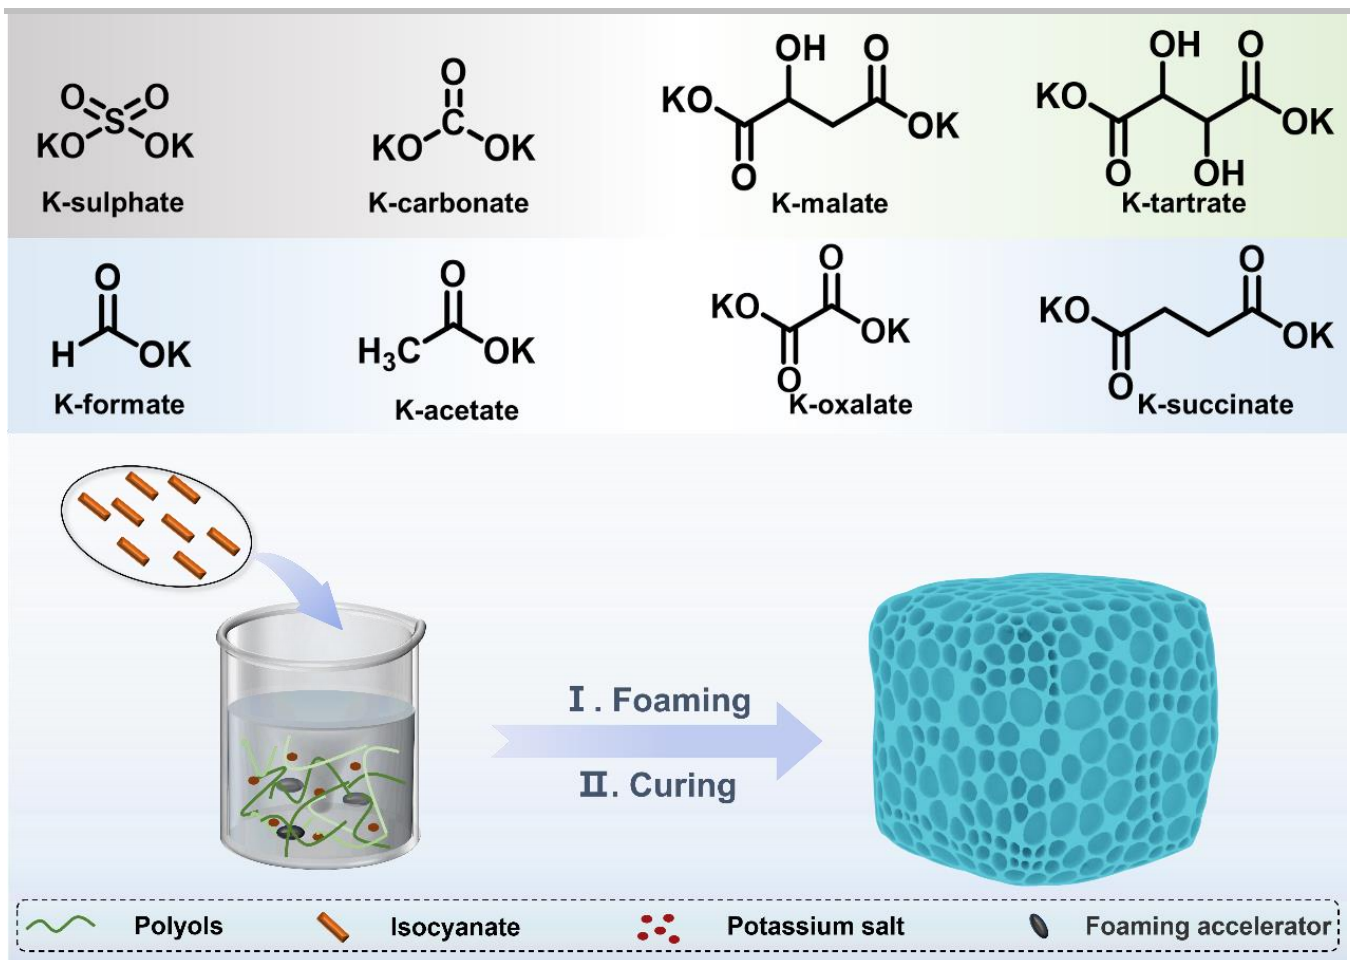

**Supplementary Figure 1.** Schematic diagram of the fabrication process for K-salt filled FPUF.

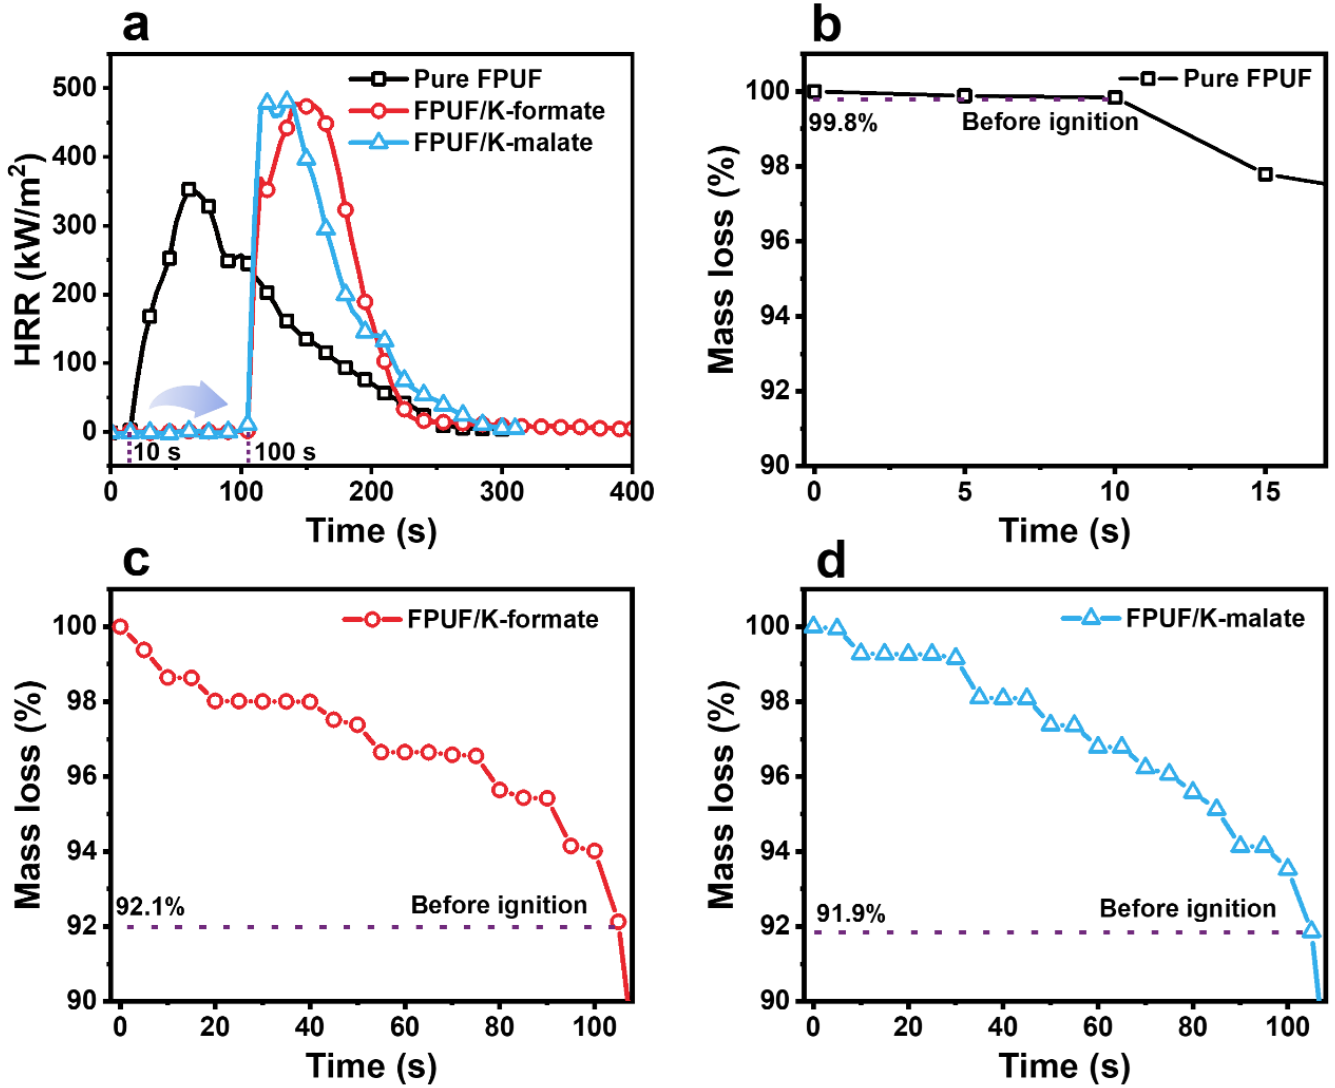

**Supplementary Figure 2.** a) Heat release rate (HRR) curves. The mass loss curves of b) pure FPUF, c) FPUF/K-formate, and d) FPUF/K-malate.

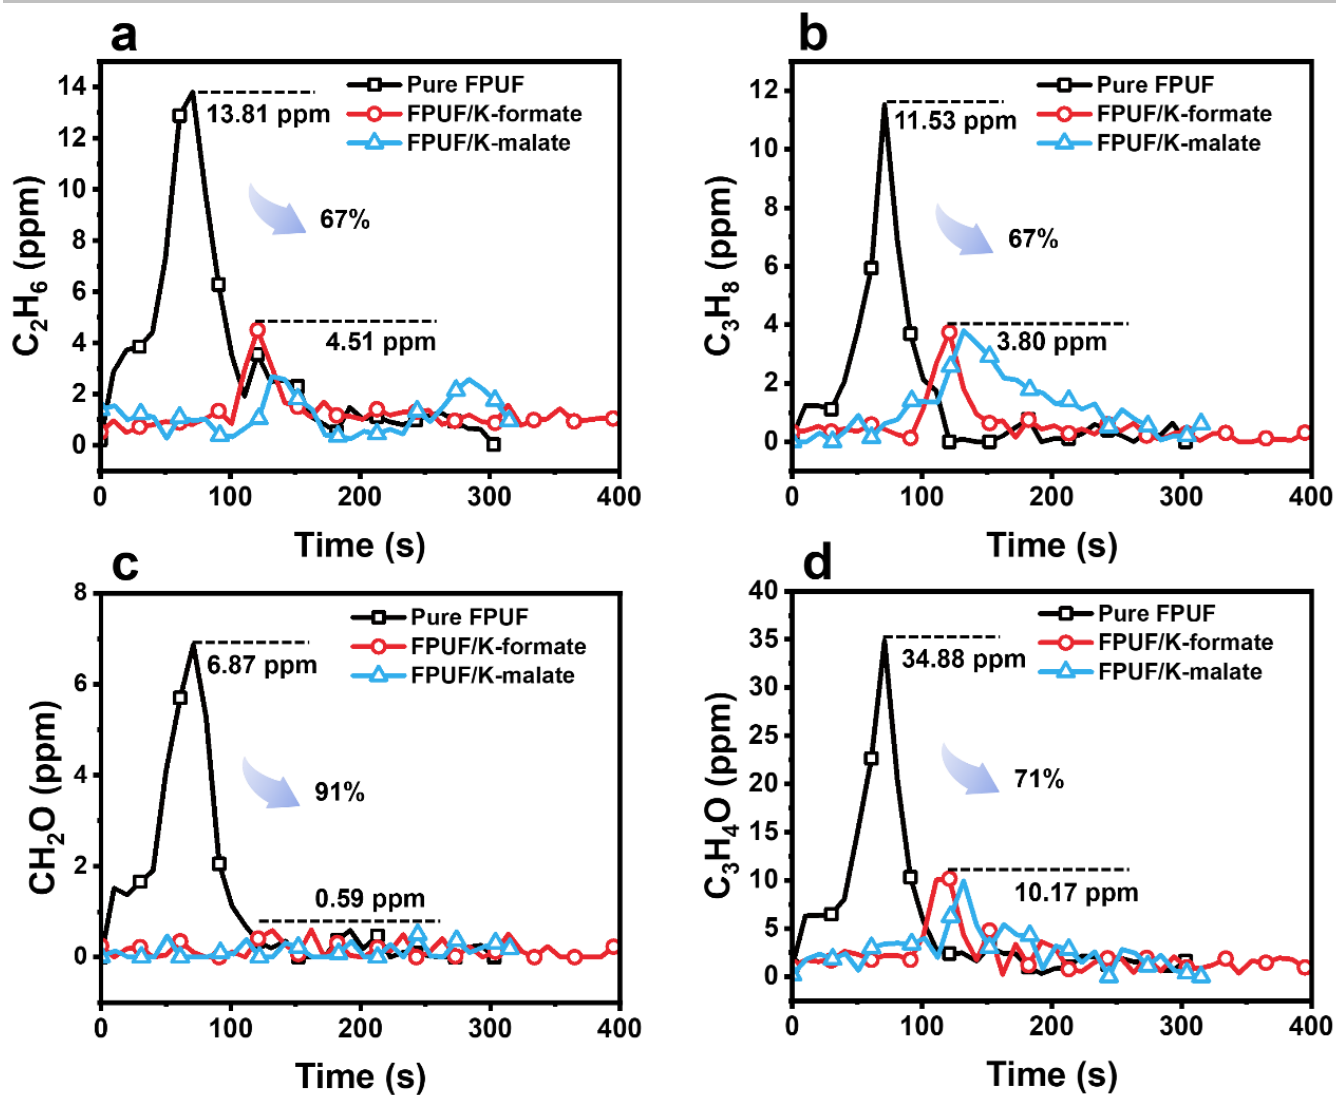

**Supplementary Figure 3.** The concentration of main products a)  $C_2H_6$ , b)  $C_3H_8$ , c)  $CH_2O$ , and d)  $C_3H_4O$  obtained from the cone calorimeter coupled with FTIR.

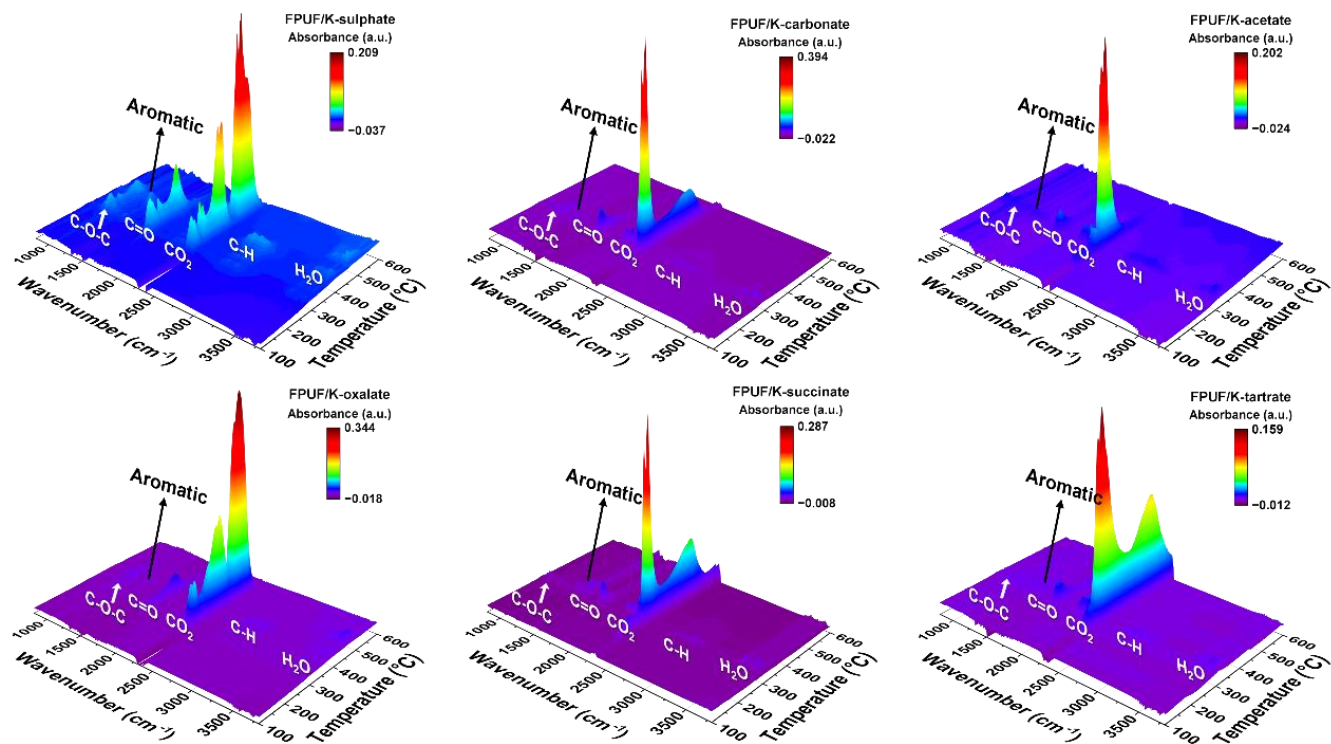

**Supplementary Figure 4.** The three-dimensional spectra of the pyrolysis products of K-salt filled FPUF obtained from TGA coupled with FTIR under air atmosphere.

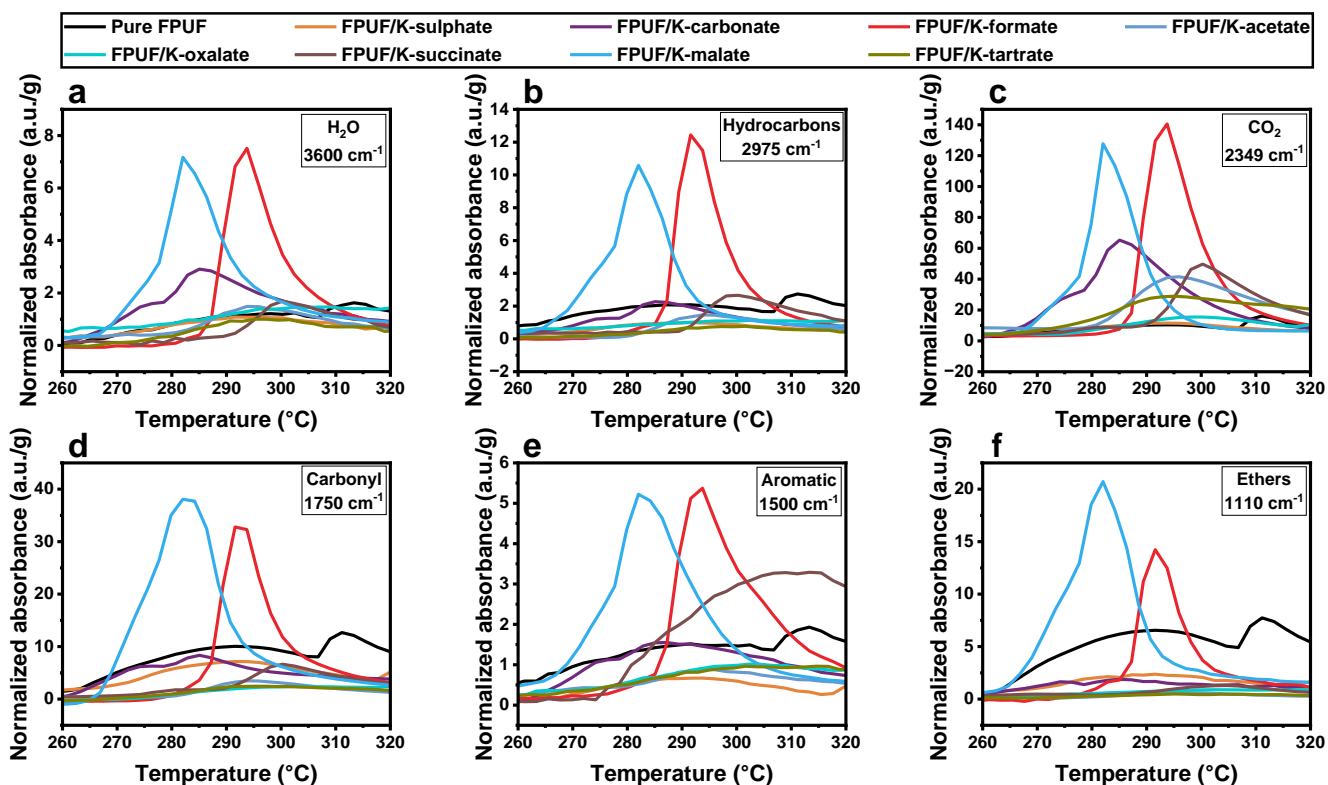

**Supplementary Figure 5.** Normalized absorbance curves of a) H<sub>2</sub>O, b) hydrocarbons, c) CO<sub>2</sub>, d) carbonyl, e) aromatic, and f) ethers during pyrolysis of K-salt filled FPUF obtained from TGA coupled with FTIR during 260-320 °C under air atmosphere. The normalized absorbance (a.u./g) of each sample is calculated by dividing the measured absorbance by its own mass.

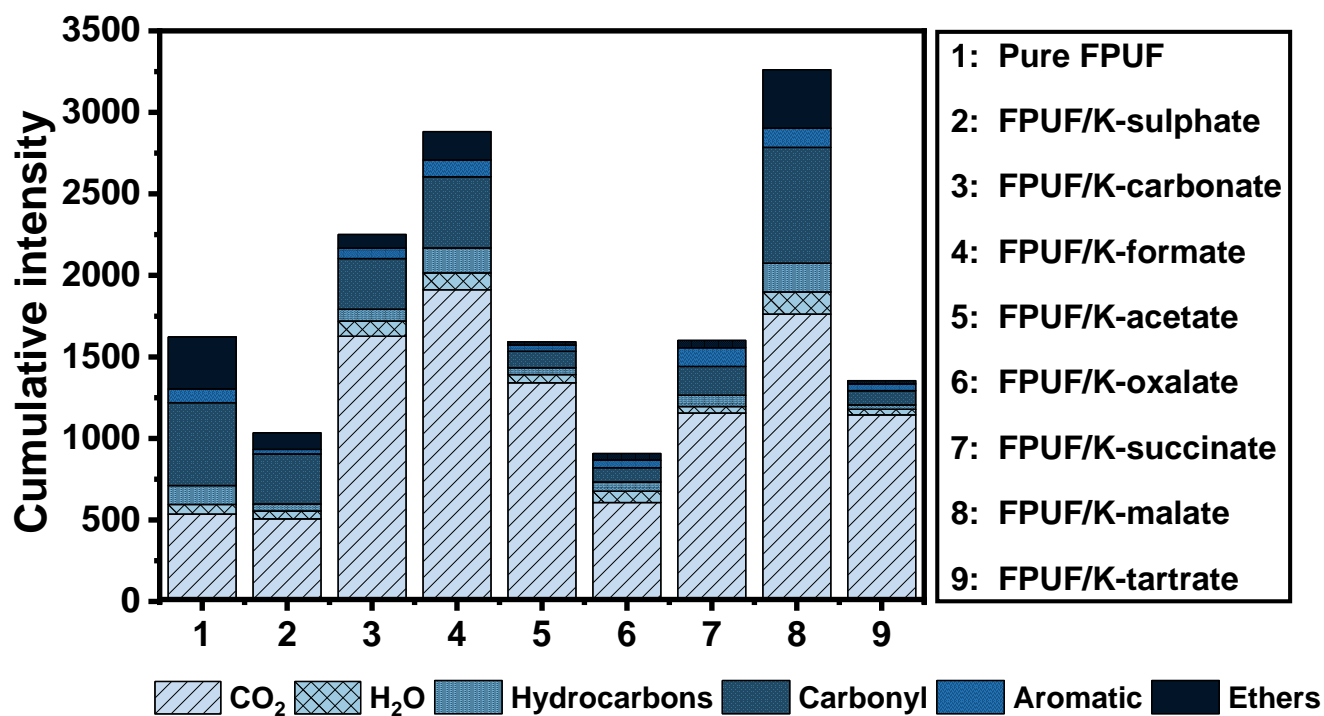

**Supplementary Figure 6.** Cumulative intensity of gas-phase pyrolysis products of K-salt filled FPUF during 260-320 °C under an air atmosphere. The cumulative intensity was obtained by integrating the normalized absorbance curve of K-salt filled FPUF during 260-320 °C.

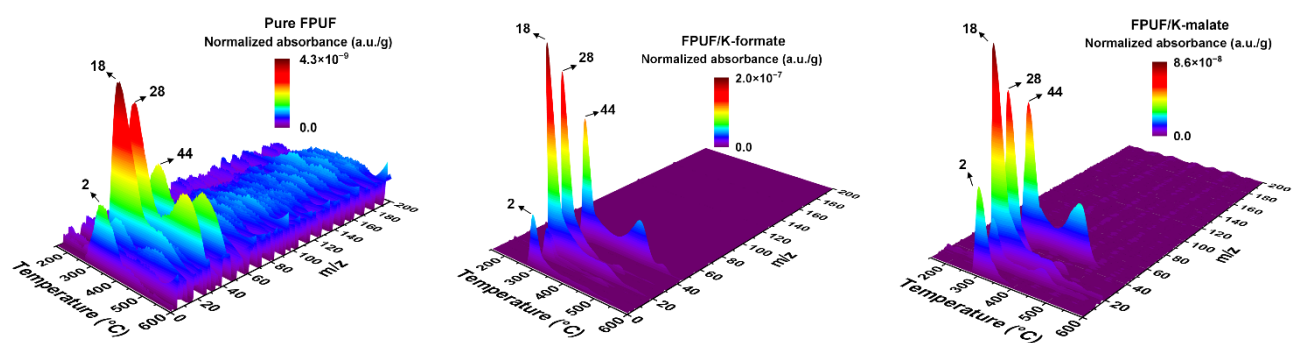

**Supplementary Figure 7.** Three-dimensional spectra of the pyrolysis products of pure FPUF, FPUF/K-formate, and FPUF/K-malate obtained from TGA coupled with MS under an air atmosphere. The normalized absorbance (a.u./g) of each sample is calculated by dividing the measured absorbance by its own mass.



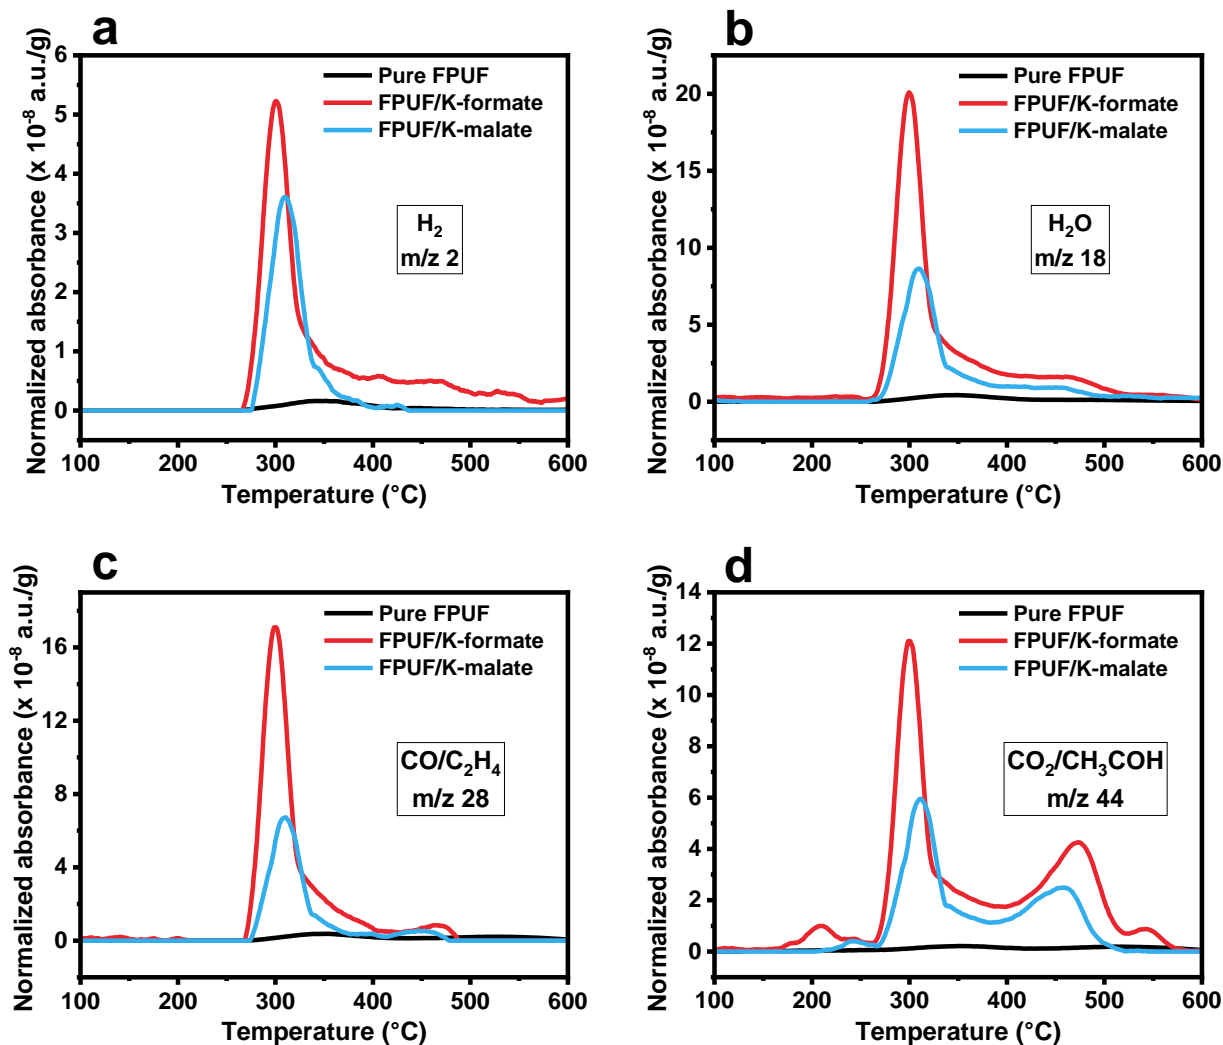

**Supplementary Figure 8.** Normalized absorbance curves of a) m/z 2, b) m/z 18, c) m/z 28, and d) m/z 44 during pyrolysis of K-formate and K-malate filled FPUF obtained from TGA coupled with MS under air atmosphere. The normalized absorbance (a.u./g) of each sample is calculated by dividing the measured absorbance by its own mass.

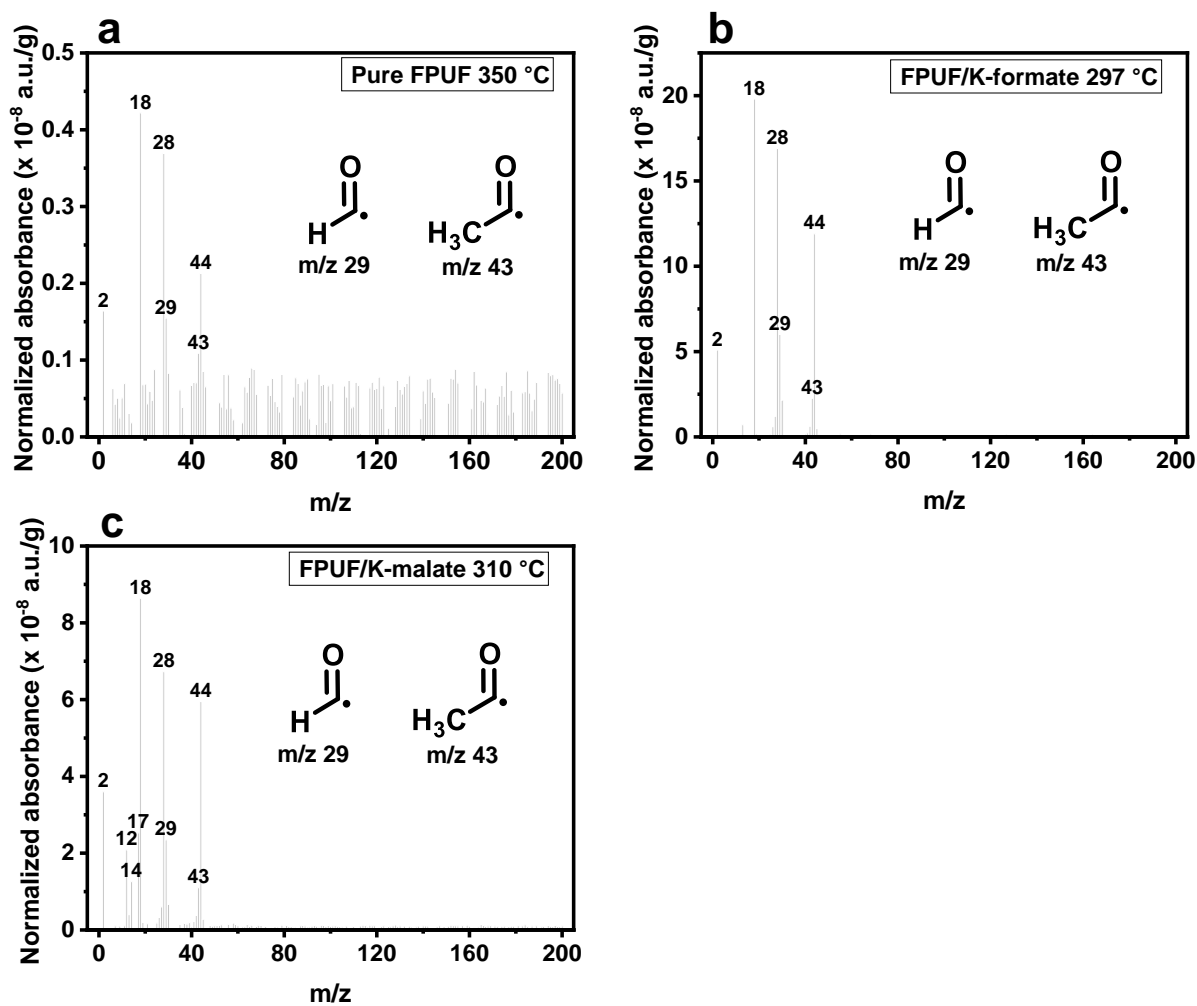

**Supplementary Figure 9.** Normalized absorbance curves of the pyrolysis products of a) pure FPUF, b) FPUF/K-formate, and c) FPUF/K-malate obtained from TGA coupled with MS at the maximum decomposition temperature under air atmosphere. The normalized absorbance (a.u./g) of each sample is calculated by dividing the measured absorbance by its own mass.

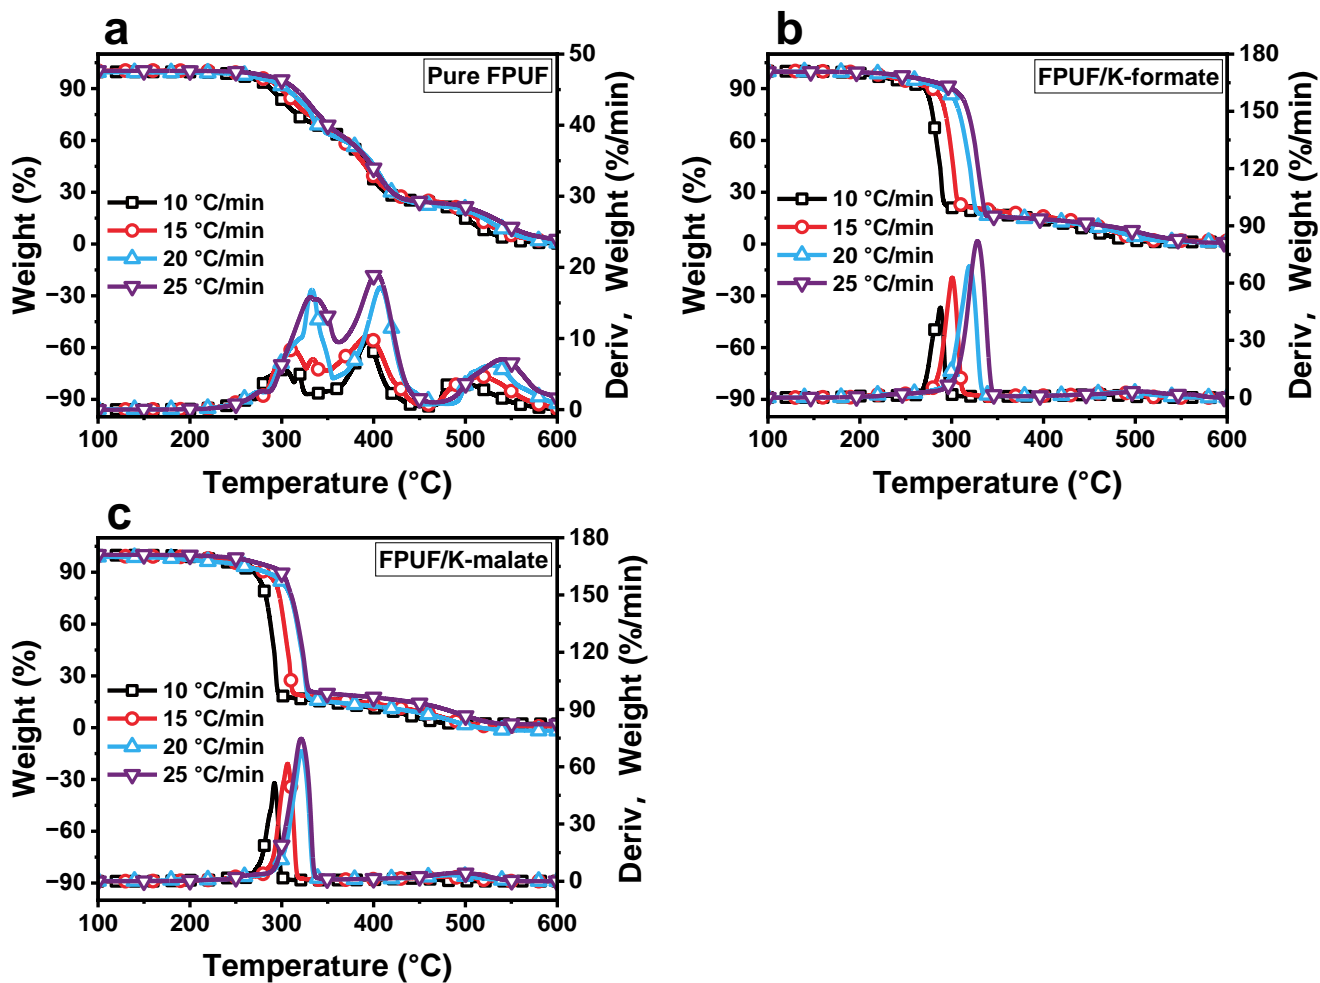

**Supplementary Figure 10.** The thermal decomposition curves of a) pure FPUF, b) FPUF/K-formate, and c) FPUF/K-malate at different heating rates under an air atmosphere.

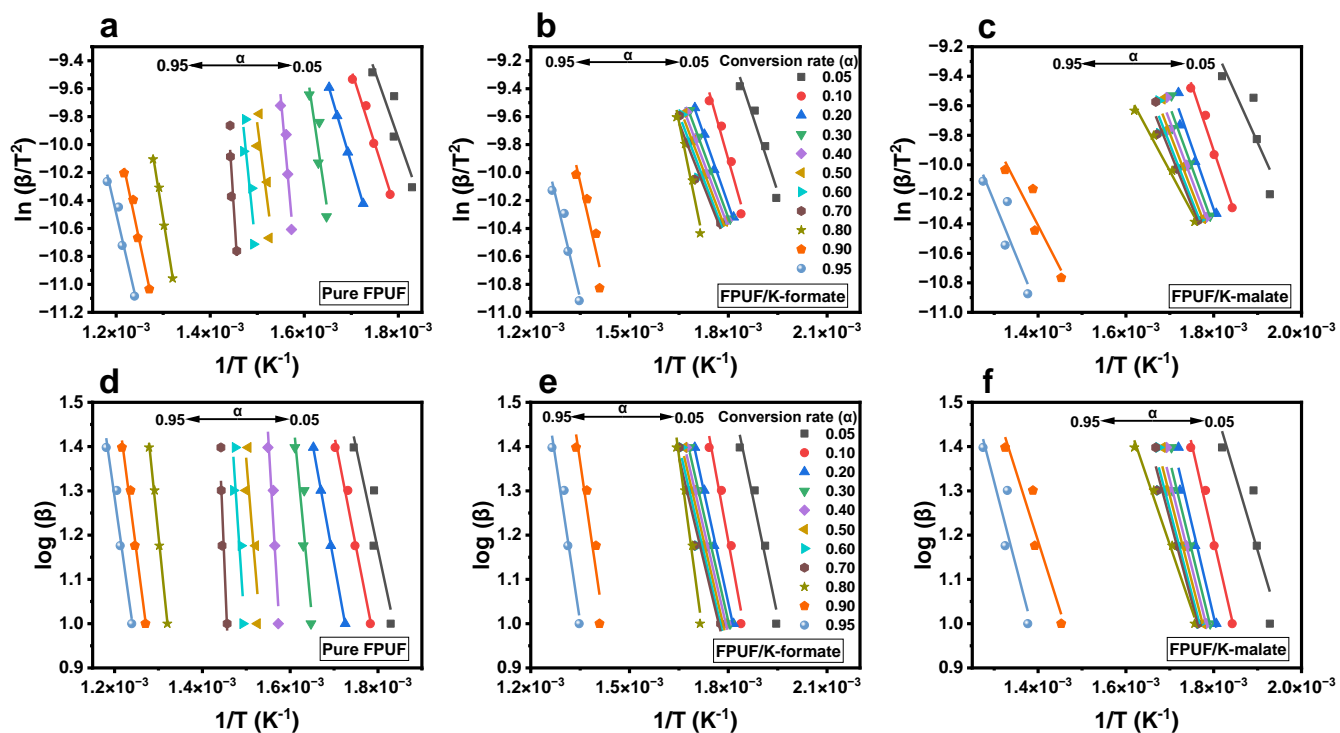

**Supplementary Figure 11.** Arrhenius plots of pure FPUF, FPUF/K-formate, and FPUF/K-malate with two model methods: a-c) Kissinger-Akahira-Sunose (KAS) method and d-f) Flynn-Wall-Ozawa (FWO) method.

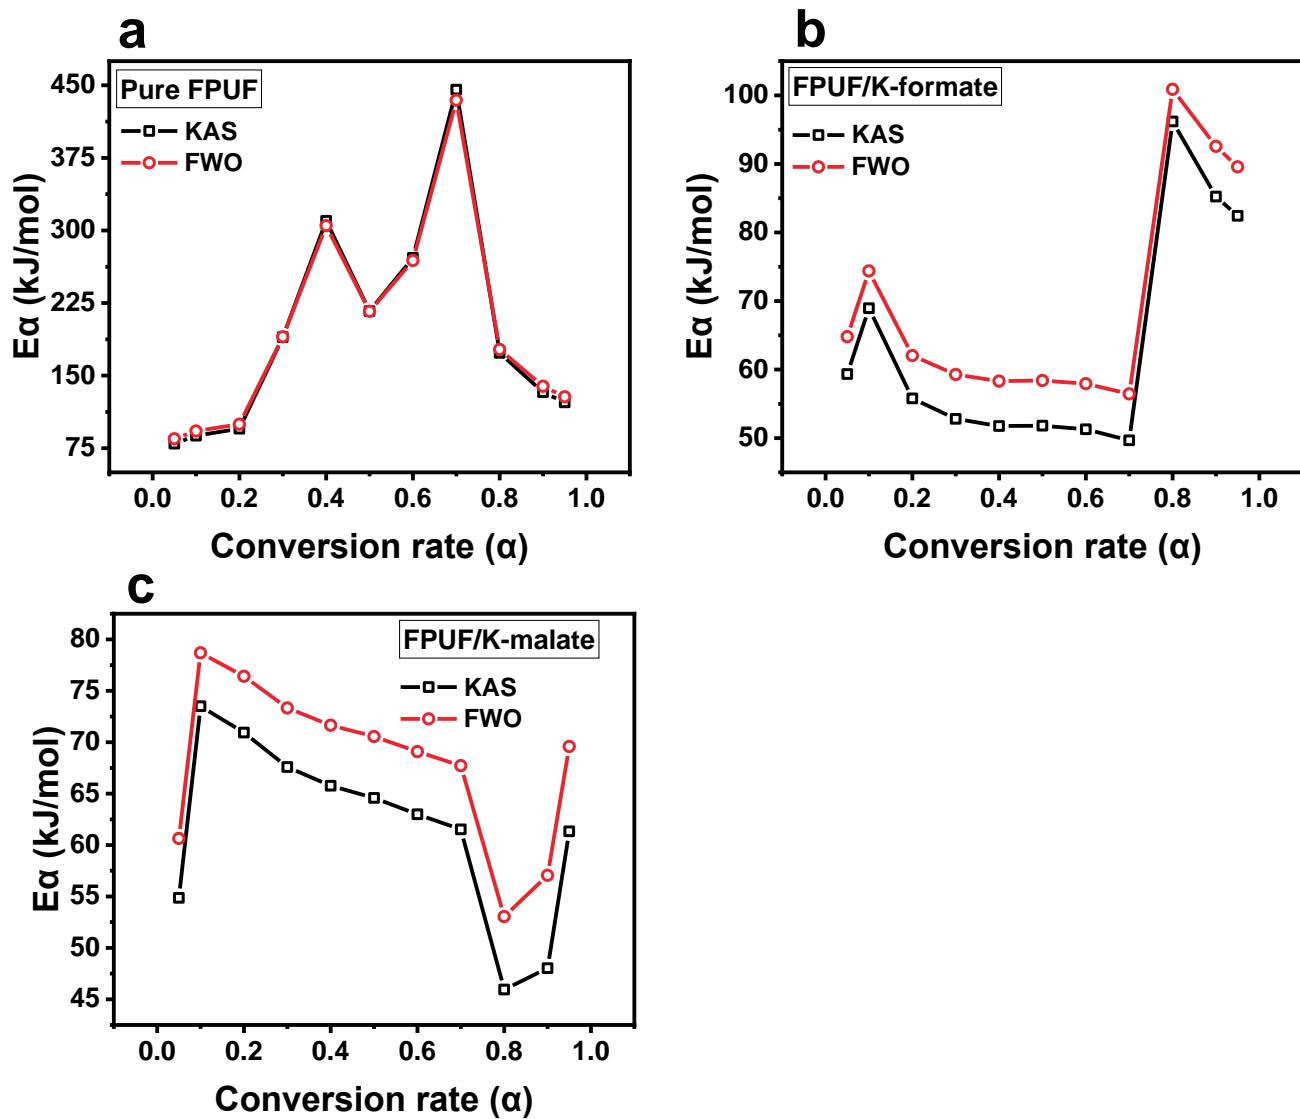

**Supplementary Figure 12.** Dependence of the apparent activation energy  $E\alpha$  and conversion rate  $\alpha$  obtained from the KAS and FWO methods: a) pure FPUF, b) FPUF/K-formate, and c) FPUF/K-malate.

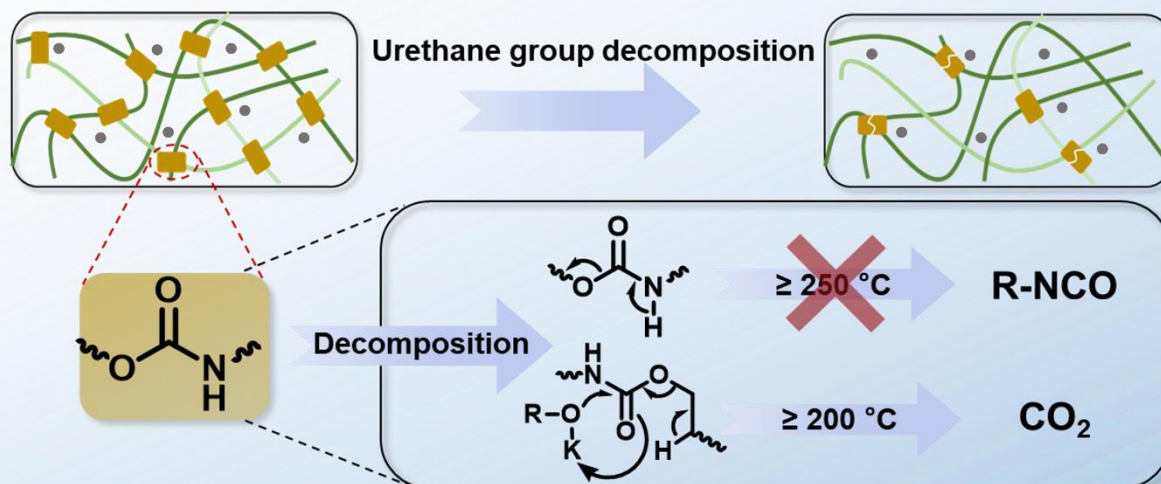

## Mechanism of potassium salt catalyzed decomposition of urethane group

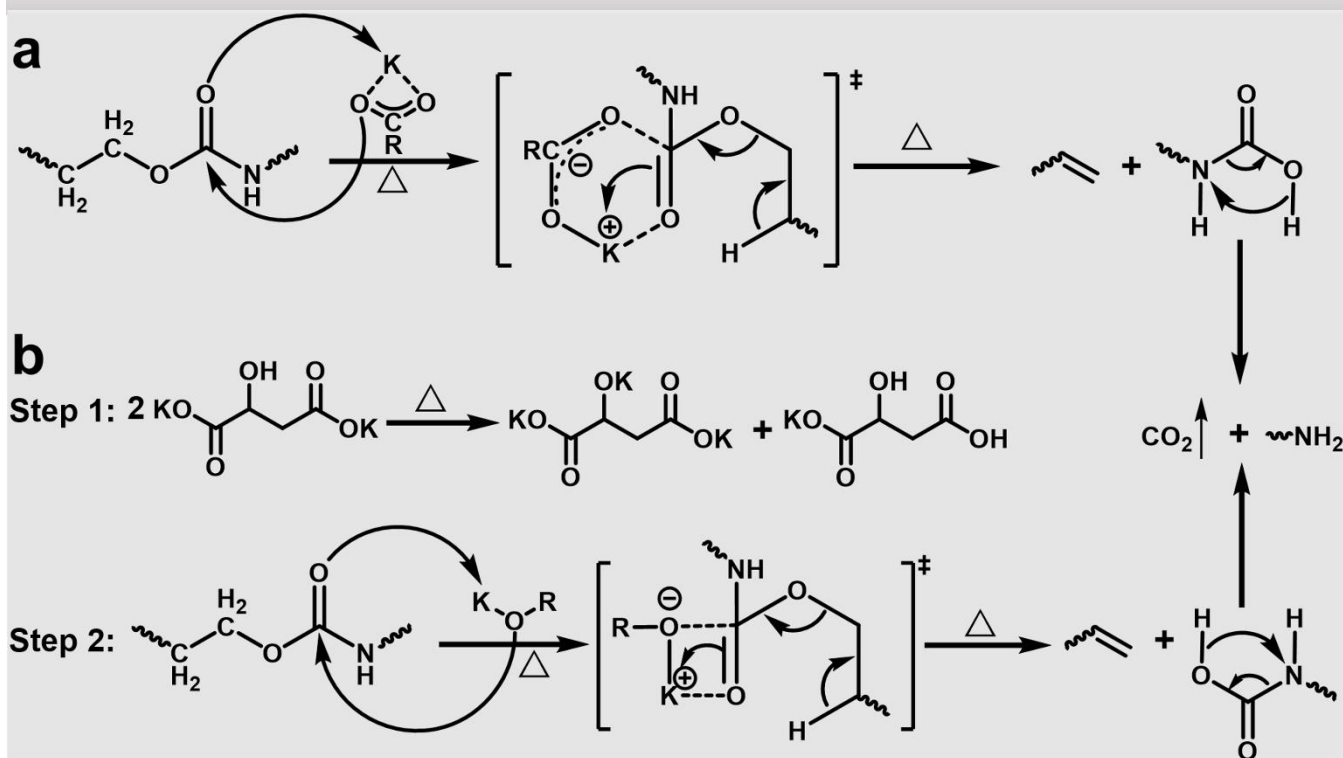

**Supplementary Figure 13.** Mechanism of potassium salt catalyzed decomposition of the urethane group.

a) Mechanism of catalytic cracking of urethane groups by hydroxyl-free potassium salts. b) Mechanism of catalytic cracking of urethane groups by hydroxyl potassium salt (taking K-malate as an example).

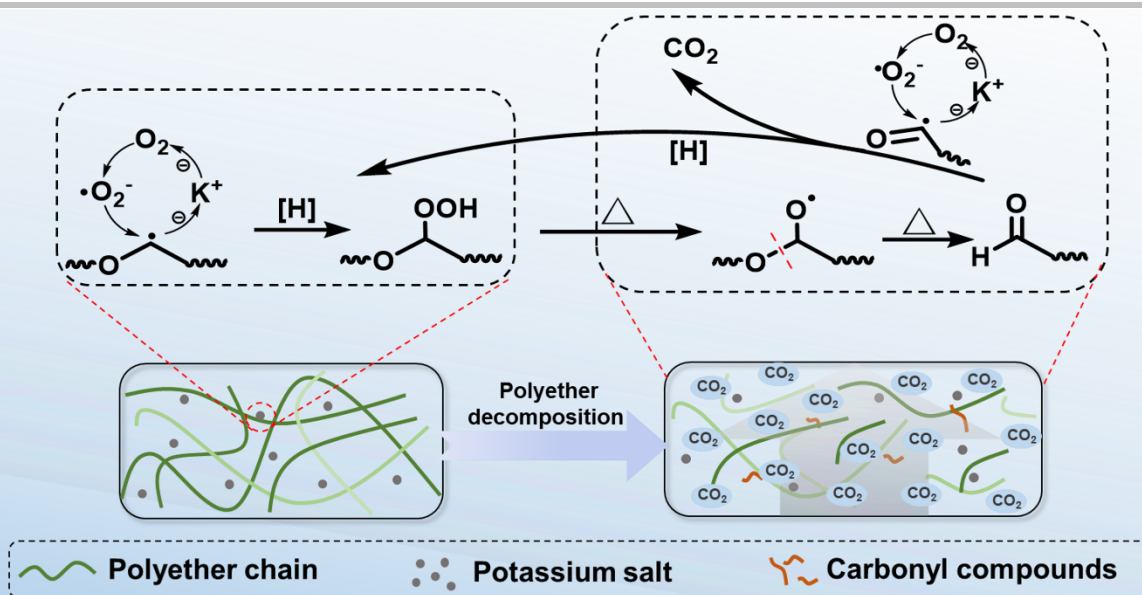

## Mechanism of potassium salt catalyzed decomposition of polyether

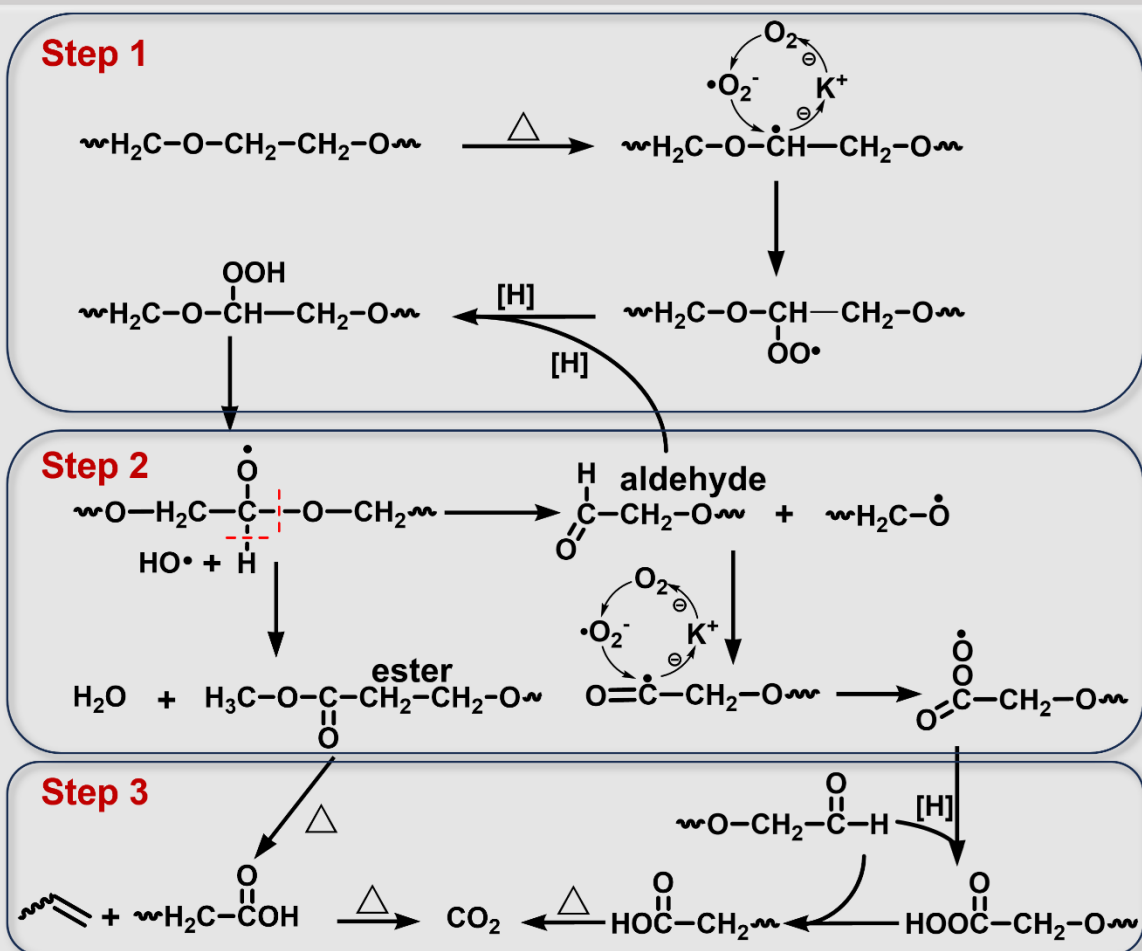

Supplementary Figure 14. Mechanism of potassium salt catalysed decomposition of polyether.

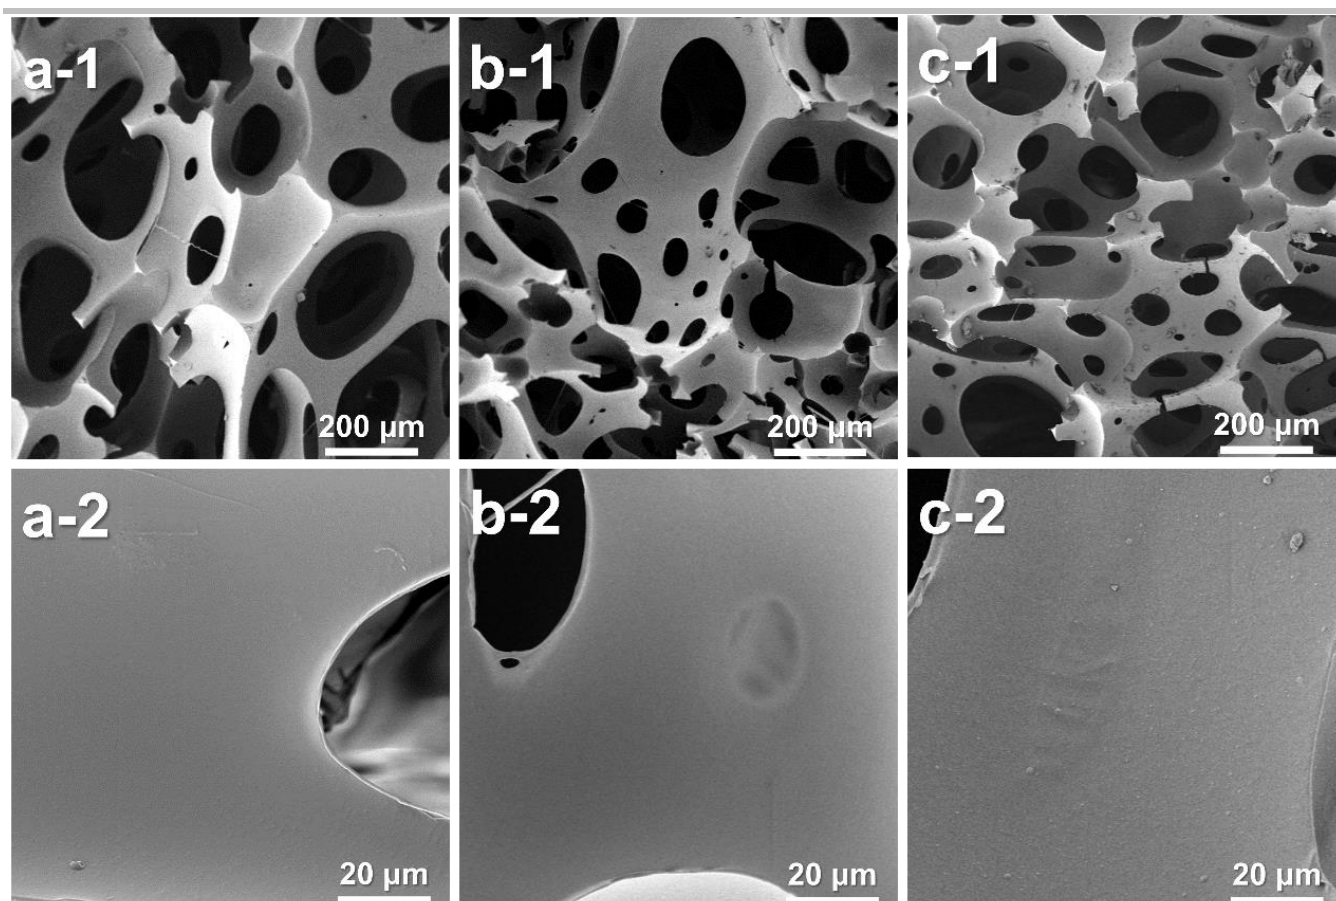

**Supplementary Figure 15.** Morphology of K-salt filled FPUF. SEM images for the brittle fracture of a) pure FPUF, b) FPUF/K-formate, and c) FPUF/K-malate.



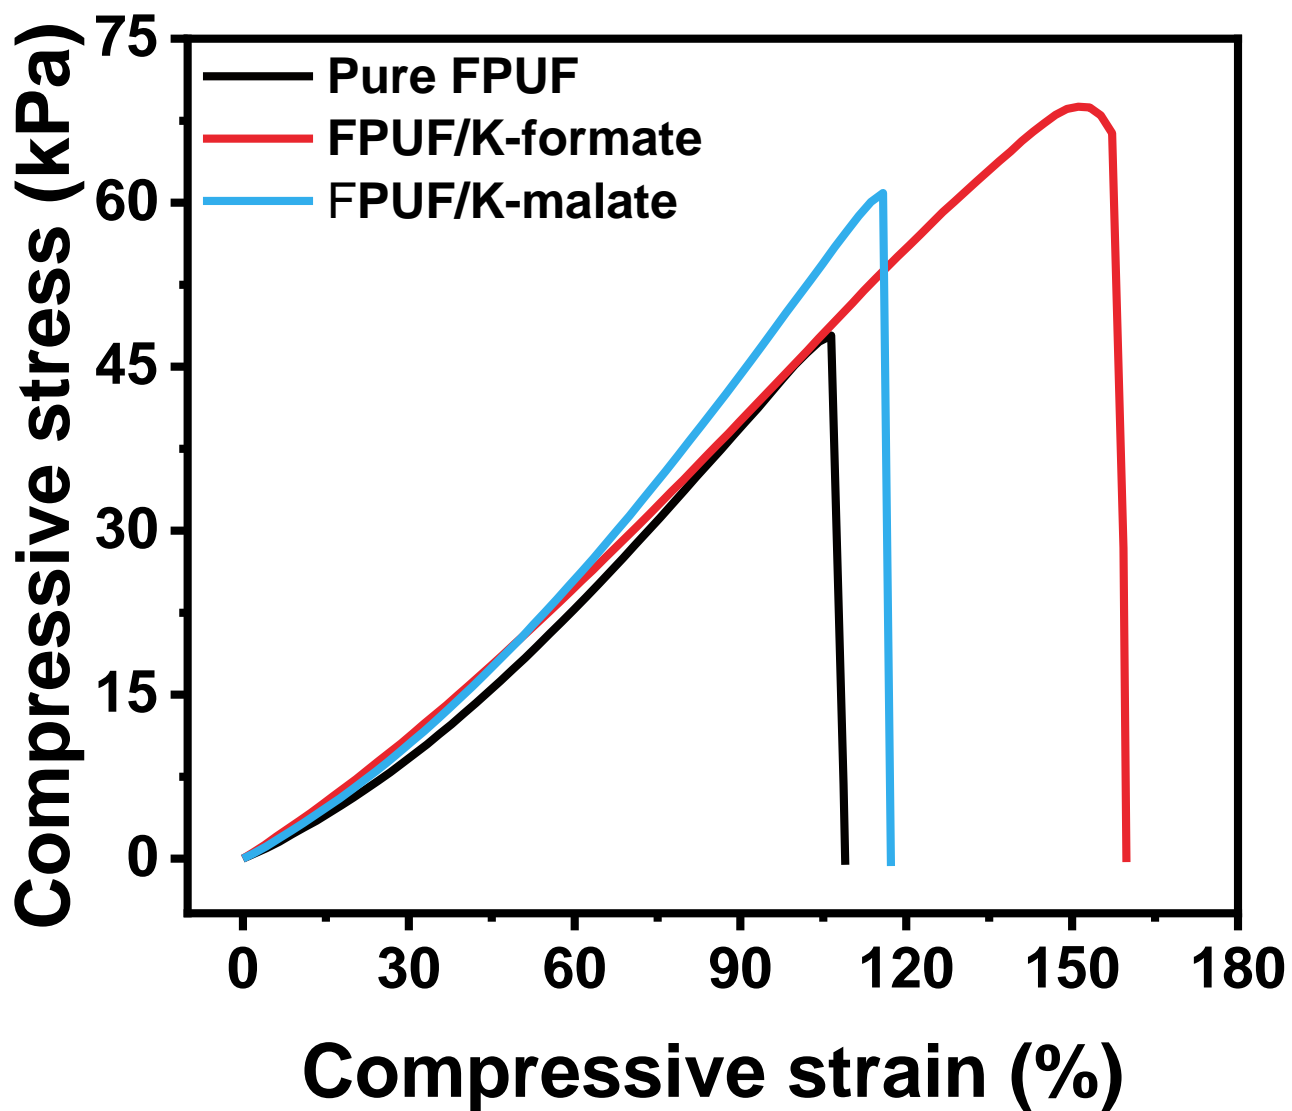

Supplementary Figure 16. Tensile stress-strain curves of pure FPUF, FPUF/K-formate, and FPUF/K-malate.

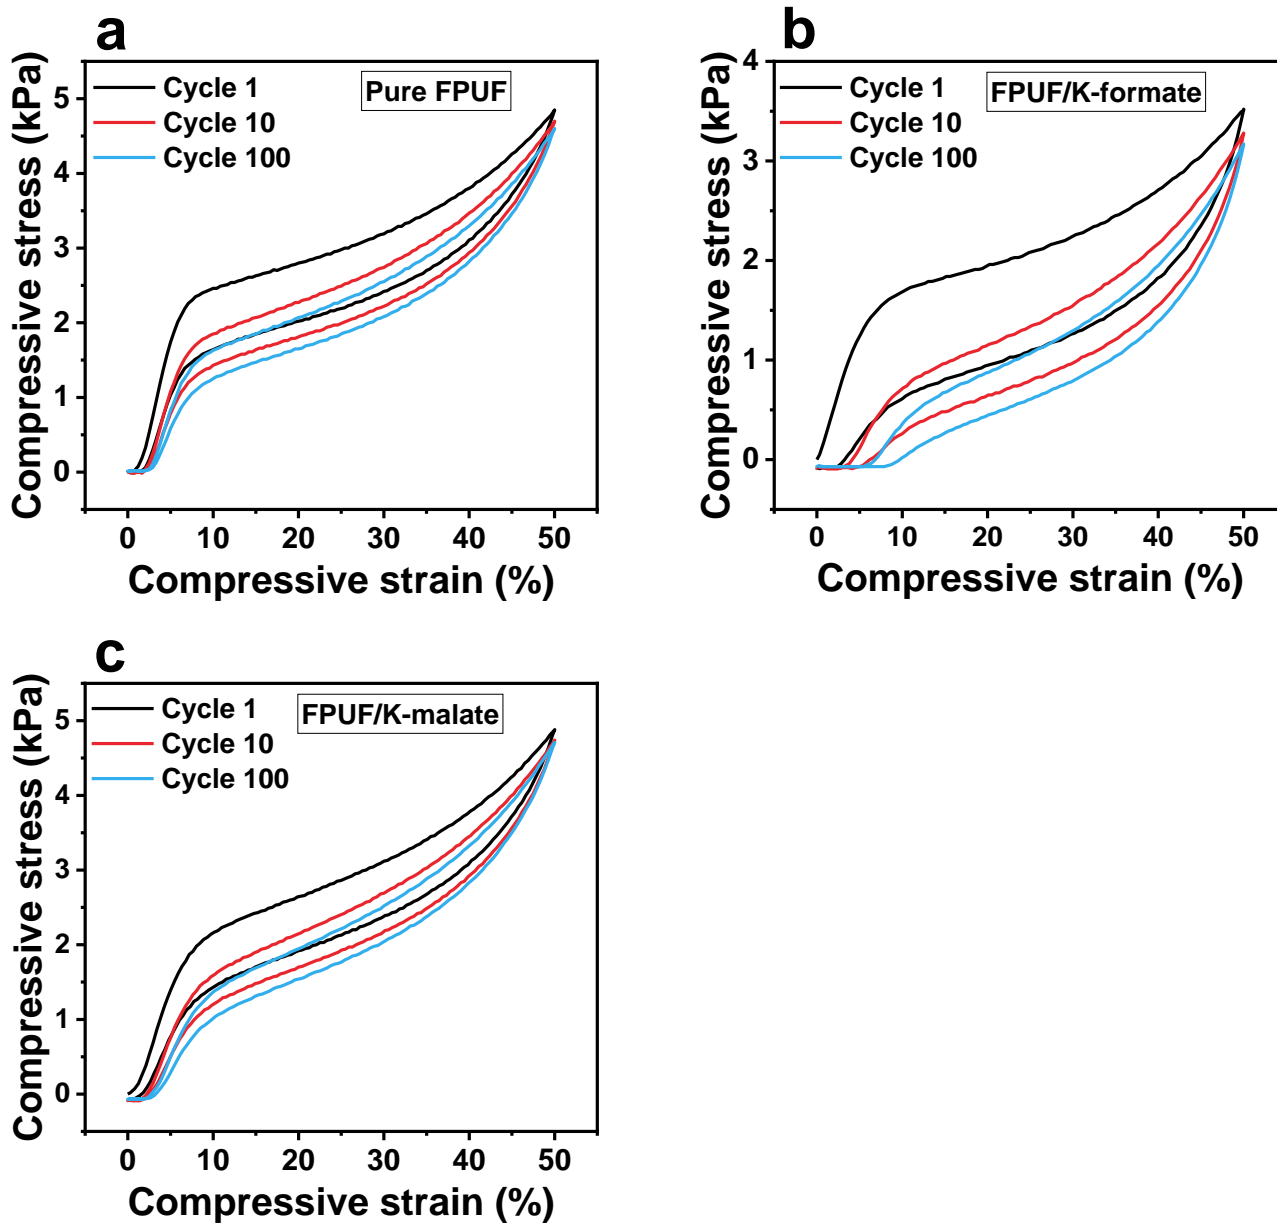

Supplementary Figure 17. Compressive cycle stress–strain curves: a) pure FPUF, b) FPUF/K-formate, and c) FPUF/K-malate.

**Supplementary Table 1.** Formulations of different FPUF samples.

| Samples                   | EP-330N<br>(wt%) <sup>a</sup> | H <sub>2</sub> O<br>(wt%) | DC-2525<br>(wt%) | TEOA<br>(wt%) | A-1<br>(wt%) | A33B<br>(wt%) | Filler<br>(wt%) | MDI-2412<br>(wt%) | Density<br>(kg/m <sup>3</sup> ) |
|---------------------------|-------------------------------|---------------------------|------------------|---------------|--------------|---------------|-----------------|-------------------|---------------------------------|
| Pure FPUF                 | 63.42                         | 1.59                      | 1.27             | 1.27          | 0.03         | 0.10          | \               | 32.34             | 59 ± 0.5                        |
| FPUF/EG                   | 59.63                         | 1.49                      | 1.19             | 1.19          | 0.02         | 0.09          | 5.96            | 30.41             | 59 ± 0.8                        |
| FPUF/TCPP                 | 59.63                         | 1.49                      | 1.19             | 1.19          | 0.02         | 0.09          | 5.96            | 30.41             | 61 ± 1.0                        |
| FPUF/K-sulphate           | 62.72                         | 1.57                      | 1.25             | 1.25          | 0.03         | 0.09          | 1.09            | 31.99             | 60 ± 0.2                        |
| FPUF/K-carbonate          | 62.87                         | 1.57                      | 1.26             | 1.26          | 0.01         | 0.09          | 0.87            | 32.07             | 61 ± 0.6                        |
| FPUF/K-formate (0.01 mol) | 63.13                         | 1.58                      | 1.26             | 1.26          | 0.01         | 0.03          | 0.53            | 32.19             | 60 ± 0.1                        |
| FPUF/K-formate (0.02 mol) | 62.79                         | 1.57                      | 1.26             | 1.26          | 0.01         | 0.03          | 1.05            | 32.03             | 59 ± 0.2                        |
| FPUF/K-formate (0.04 mol) | 62.14                         | 1.55                      | 1.24             | 1.24          | 0.01         | 0.03          | 2.09            | 31.69             | 61 ± 0.5                        |
| FPUF/K-acetate            | 62.68                         | 1.57                      | 1.25             | 1.25          | 0.01         | 0.03          | 1.23            | 31.97             | 61 ± 0.5                        |
| FPUF/K-oxalate            | 62.75                         | 1.57                      | 1.26             | 1.26          | 0.03         | 0.09          | 1.04            | 32.01             | 61 ± 0.2                        |
| FPUF/K-succinate          | 62.64                         | 1.57                      | 1.25             | 1.25          | 0.03         | 0.09          | 1.22            | 31.95             | 60 ± 0.2                        |
| FPUF/K-malate (0.01 mol)  | 63.00                         | 1.57                      | 1.26             | 1.26          | 0.03         | 0.09          | 0.66            | 32.13             | 60 ± 0.3                        |
| FPUF/K-malate (0.02 mol)  | 62.58                         | 1.56                      | 1.25             | 1.25          | 0.03         | 0.09          | 1.31            | 31.92             | 61 ± 0.2                        |
| FPUF/K-malate (0.04 mol)  | 61.60                         | 1.54                      | 1.23             | 1.23          | 0.02         | 0.37          | 2.59            | 31.42             | 61 ± 0.5                        |
| FPUF/K-tartrate           | 62.34                         | 1.56                      | 1.25             | 1.25          | 0.02         | 0.37          | 1.41            | 31.80             | 60 ± 0.4                        |

**Supplementary Table 2.** Results of the horizontal burning test (UL 94-HB).

| <b>Samples</b> | <b>Burning velocity (mm/min)</b> | <b>Ignite absorbent cotton<br/>(Yes/No)</b> | <b>Rating</b> |
|----------------|----------------------------------|---------------------------------------------|---------------|
| Pure FPUF      | $63.0 \pm 7.6$                   | Yes                                         | NO            |
| FPUF/EG        | $20.7 \pm 3.7$                   | No                                          | HBF           |
| FPUF/TCPP      | /                                | Yes                                         | HF-2          |
| FPUF/K-formate | /                                | No                                          | HF-1          |
| FPUF/K-malate  | /                                | No                                          | HF-1          |

**Supplementary Table 3.** Performance comparison of this study with phosphorus-containing FPUF reported in recent years.

| Method                                | Flame retardant | Loading (wt%) | LOI (%) | Variation of tensile stress (%) | Variation of tensile strain (%) | Phosphorus content of FRs (%) | Refs      |
|---------------------------------------|-----------------|---------------|---------|---------------------------------|---------------------------------|-------------------------------|-----------|
| Phosphorus-dominated FRs              | K-formate       | 1.05          | 26.5    | +42                             | +50                             | 0.0                           | This work |
|                                       | K-malate        | 1.31          | 26.0    | +19                             | +10                             | 0.0                           | This work |
|                                       | PPNs            | 3.50          | 21.0    | +40                             | +14                             | 6.4                           | 1         |
|                                       | DPM             | 1.80          | 21.8    | +11                             | +27                             | 13.4                          | 2         |
|                                       | DOM             | 1.80          | 21.2    | +17                             | +21                             | 12.6                          | 2         |
|                                       | DPE             | 1.80          | 21.4    | +13                             | +30                             | 11.8                          | 2         |
|                                       | PDEO            | 9.00          | 23.0    | +5                              | -14                             | 21.1                          | 3         |
|                                       | PSO             | 19.40         | 21.0    | +15                             | +54                             | 5.5                           | 4         |
|                                       | BDMPP           | 12.05         | 23.0    | \                               | \                               | 22.2                          | 5         |
|                                       | DMMP            | 12.11         | 21.5    | \                               | \                               | 25.0                          | 5         |
|                                       | DMPMA           | 12.06         | 22.3    | \                               | \                               | 16.0                          | 6         |
|                                       | TAMPO           | 12.02         | 19.4    | \                               | \                               | 10.3                          | 6         |
|                                       | DH-DOPO         | 12.11         | 22.0    | +25                             | -30                             | 9.3                           | 7         |
|                                       | D-Mel           | 12.09         | 24.0    | +35                             | -11                             | 8.6                           | 8         |
| D-DICY                                | 12.04           | 24.5          | +53     | -13                             | 9.9                             | 8                             |           |
| Phosphorus and nitrogen dominated FRs | D-Urea          | 12.02         | 23.5    | +27                             | -1.6                            | 10.6                          | 8         |
|                                       | MPBT            | 10.00         | 22.5    | +56                             | -21                             | 8.6                           | 9         |
|                                       | PPBT            | 10.00         | 21.5    | +69                             | -29                             | 7.3                           | 9         |
|                                       | POBT            | 10.00         | 22.0    | +63                             | -26                             | 7.1                           | 9         |
|                                       | DPPMA           | 9.23          | 23.7    | +4.5                            | +12                             | 9.1                           | 10        |
|                                       | DMOP            | 16.24         | 22.7    | -30                             | -13                             | 18.7                          | 11        |
|                                       | CPK             | 12.45         | 23.5    | +36                             | -22                             | 1.7                           | 12        |

**PPNs:** Phosphorus containing biophenolic nanospheres; **DPM:** Hydroxymethyl diphenylphosphine oxide; **DOM:** 6-(hydroxymethyl)dibenzo[c,e][1,2]oxaphosphinine-6-oxide; **DPE:** 2-hydroxyethyl diphenylphosphinate; **POBT:** Phenyl phosphate 2-aminobenzothiazole; **PDEO:** Phosphorus-containing polyol; **PSO:** Phosphorous soybean-oil-based; **BDMPP:** Bis((dimethoxyphosphoryl)methyl) phenyl phosphate; **DMMP:** Dimethyl methanephosphonate; **DMPMA:** (Dimethoxyphosphoryl)methyl acrylate; **TAMPO:** Tris(acryloyloxymethyl)phosphine oxide; **DH-DOPO:** 9,10-dihydro-9-oxa-10-phosphaphenanthrene 10-oxide-diethanolamine; **D-Mel:** 10-hydroxy-9,10-dihydro-9-oxa-10-phosphaphenanthrene-10-oxide melamine salt; **D-DICY:** 10-hydroxy-9,10-dihydro-9-oxa-10-phosphaphenanthrene-10-oxide dicyandiamide salt; **D-Urea:** 10-hydroxy-9,10-dihydro-9-oxa-10-phosphaphenanthrene-10-oxide urea salt; **MPBT:** Methyl phosphoryl 2-aminobenzothiazole; **PPBT:** Phenylphosphoryl 2-aminobenzothiazole; **DPPMA:** Melamine salt; **DMOP:** Polyester polyol; **CPK:** Diphenylphosphine chloride modified castor oil.

**Supplementary Table 4.** Performance comparison of this study with other phosphorus-free flame-retardant FPUF reported in recent years.

| Flame retardant                                             | Loading (wt%) | LOI (%) | Variation of tensile stress (%) | Variation of tensile strain (%) | Refs      |
|-------------------------------------------------------------|---------------|---------|---------------------------------|---------------------------------|-----------|
| K-formate                                                   | 1.05          | 26.5    | +42                             | +50                             | This work |
| K-malate                                                    | 1.31          | 26.0    | +19                             | +10                             | This work |
| MEL                                                         | 9.29          | 22.5    | \                               | \                               | 13        |
| ZB                                                          | 9.29          | 21.5    | \                               | \                               | 13        |
| MH                                                          | 9.29          | 21.5    | \                               | \                               | 13        |
| LDH (Carbonate intercalated Mg/Al layered double hydroxide) | 2.91          | 17.1    | \                               | \                               | 14        |
| Ti <sub>3</sub> C <sub>2</sub> T <sub>x</sub>               | 3.97          | \       | +48                             | -9.4                            | 15        |
| Ti <sub>3</sub> C <sub>2</sub> T <sub>x</sub> @MOF-LDH      | 3.97          | \       | +54                             | +8.3                            | 15        |
| ZIF-8@Ti <sub>3</sub> C <sub>2</sub> T <sub>x</sub>         | 3.97          | \       | +53                             | -30                             | 16        |
| rGO                                                         | 2.02          | \       | +33                             | -27                             | 17        |
| rGO@CuO                                                     | 2.02          | \       | +33                             | -34                             | 17        |
| rGO@Cu <sub>2</sub> O                                       | 2.02          | \       | +67                             | -13                             | 17        |
| rGO@CSOH                                                    | 2.02          | \       | +50                             | -35                             | 17        |
| CNS@Ce <sub>2</sub> SnO <sub>7</sub>                        | 2.02          | \       | +86                             | -25                             | 18        |

**Supplementary Table 5.** Characteristic data of different FPUF samples in the cone calorimetry.

| <b>Samples</b> | <b>TTI<sup>a</sup><br/>(s)</b> | <b>pHRR<sup>b</sup><br/>(kW/m<sup>2</sup>)</b> | <b>t<sub>p</sub><sup>c</sup><br/>(s)</b> | <b>FPI<sup>e</sup><br/>(m<sup>2</sup>s/kW)</b> | <b>FGI<sup>f</sup><br/>(kW/m<sup>2</sup>/s)</b> |
|----------------|--------------------------------|------------------------------------------------|------------------------------------------|------------------------------------------------|-------------------------------------------------|
| Pure FPUF      | 11 ± 2                         | 389 ± 37                                       | 62 ± 3                                   | 0.03 ± 0.01                                    | 6.27 ± 0.60                                     |
| FPUF/K-formate | 102 ± 3                        | 488 ± 10                                       | 138 ± 3                                  | 0.21 ± 0.01                                    | 3.54 ± 0.07                                     |
| FPUF/K-malate  | 105 ± 1                        | 481 ± 1                                        | 130 ± 5                                  | 0.22 ± 0.01                                    | 3.70 ± 0.01                                     |

**a)** TTI: Time to ignition

**b)** pHRR: Peak heat release rate

**c)** t<sub>p</sub>: Time to pHRR

**d)** FPI: Fire performance index, TTI/pHRR

**e)** FGI: Fire growth index, pHRR/t<sub>p</sub>

**Supplementary Table 6.** Peak concentrations of the main products of pure FPUF, FPUF/K-formate, and FPUF/K-malate obtained from the cone calorimeter test.

| <b>Samples</b> | <b>CO<sub>2</sub><br/>(ppm<sup>a</sup>)</b> | <b>C<sub>2</sub>H<sub>6</sub><br/>(ppm)</b> | <b>C<sub>2</sub>H<sub>4</sub><br/>(ppm)</b> | <b>CH<sub>2</sub>O<br/>(ppm)</b> | <b>C<sub>3</sub>H<sub>4</sub>O<br/>(ppm)</b> |
|----------------|---------------------------------------------|---------------------------------------------|---------------------------------------------|----------------------------------|----------------------------------------------|
| Pure FPUF      | 8150 ± 250                                  | 13.39 ± 0.42                                | 11.25 ± 0.28                                | 6.68 ± 0.20                      | 34.31 ± 0.57                                 |
| FPUF/K-formate | 13850 ± 150                                 | 3.88 ± 0.64                                 | 3.50 ± 0.24                                 | 0.53 ± 0.06                      | 10.76 ± 0.59                                 |
| FPUF/K-malate  | 14000 ± 300                                 | 2.48 ± 0.22                                 | 2.95 ± 0.86                                 | 0.51 ± 0.04                      | 9.78 ± 0.18                                  |

a) ppm: parts per million



**Supplementary Table 7.** Smoke toxicity gas concentration and general conventional index of toxicity ( $CIT_G$ ) obtained from smoke toxicity tests for the different samples.

| Samples                | Pure FPUF     | FPUF/TCPP     | FPUF/K-formate | FPUF/K-malate |
|------------------------|---------------|---------------|----------------|---------------|
| CO/(ppm)               | 67.8 ± 1.2    | 75.6 ± 9.5    | 67.7 ± 4.1     | 55.1 ± 6.6    |
| HCN/(ppm)              | 5.1 ± 0.1     | 5.5 ± 0.3     | 1.9 ± 0.7      | 1.6 ± 0.4     |
| NO <sub>x</sub> /(ppm) | 96.3 ± 2.8    | 51.3 ± 3.3    | 1.8 ± 0.9      | 12.1 ± 1.8    |
| $CIT_G$                | 0.381 ± 0.007 | 0.219 ± 0.015 | 0.019 ± 0.003  | 0.053 ± 0.031 |

The general conventional toxicity index ( $CIT_G$ ) is derived from the gaseous concentrations measured at according to the formula:

$$CIT_G = \frac{0.51 \text{ m}^3 \times 0.1 \text{ m}^2}{150 \text{ m}^3 \times 0.004225 \text{ m}^2} \times \sum_{i=1}^{i=8} \frac{c_i}{C_i}$$

where the model is the combustion of 0.1 m<sup>2</sup> of product; the gaseous effluents are dispersed in 150 m<sup>3</sup>; the volume of the test chamber is 0.51 m<sup>3</sup>; the exposed surface of the test specimen is 0.004225 m<sup>2</sup>.  $c_i$  is the concentration measured in mg/m<sup>3</sup> of the i<sup>th</sup> gas in the smoke chamber according to EN ISO 5659-2 and  $C_i$  is the IDLH reference concentration in mg/m<sup>3</sup> of the i<sup>th</sup> gas.  $CIT_G$  values are dimensionless. The most restrictive value of  $CIT_G$  inside the EN 45545-2 is 0.75, which means that values inferior to those could qualify the product for railway applications.

---

**Supplementary Table 8.** Results of the smoke density (Ds) test.

---

| <b>Samples</b> | <b>Ds, 1.5<sup>a</sup></b> |
|----------------|----------------------------|
| Pure FPUF      | 83.2 ± 4.7                 |
| FPUF/TCPP      | 107.8 ± 6.6                |
| FPUF/K-formate | 23.3 ± 1.5                 |
| FPUF/K-malate  | 19.8 ± 1.5                 |

---

a) Ds, 1.5: Smoke density at 1.5 minutes

**Supplementary Table 9.** TGA data of different FPUF samples under air atmosphere.

| Samples          | $T_{5\%}^a$<br>(°C) | $T_{max1}^b$<br>(°C) | $T_{max2}$<br>(°C) | $CY_{260}^c$<br>(%) | $CY_{320}$<br>(%) | $CY_{600}$<br>(%) |
|------------------|---------------------|----------------------|--------------------|---------------------|-------------------|-------------------|
| Pure FPUF        | 271                 | 290                  | 388                | 96.3                | 70.1              | 0.7               |
| FPUF/K-sulphate  | 278                 | 290                  | 394                | 97.1                | 78.1              | 1.6               |
| FPUF/K-carbonate | 245                 | 186                  | 285                | 92.9                | 17.0              | 1.0               |
| FPUF/K-formate   | 245                 | 184                  | 291                | 93.2                | 8.8               | 1.1               |
| FPUF/K-acetate   | 254                 | 185                  | 291                | 94.3                | 18.3              | 1.2               |
| FPUF/K-oxalate   | 274                 | 291                  | 387                | 97.3                | 70.8              | 1.5               |
| FPUF/K-succinate | 260                 | 195                  | 291                | 95.0                | 15.1              | 0.5               |
| FPUF/K-malate    | 249                 | 193                  | 281                | 92.9                | 15.1              | 1.3               |
| FPUF/K-tartrate  | 274                 | 258                  | 293                | 97.0                | 32.0              | 1.0               |

**a)**  $T_{5\%}$ : Temperature at 5% weight loss

**b)**  $T_{max1}$ : Temperature at maximum thermal decomposition

**c)**  $CY_{260}$ : Residual rate at 260 °C

The red temperature is the  $T_{max}$  of the maximum decomposition stage of different FPUF samples.

**Supplementary Table 10.** Cumulative intensities of the gaseous phase pyrolysis products of K-salt filled FPUFs during 260-320 °C under an air atmosphere. The cumulative intensity was obtained by integrating the normalized absorbance curve of K-salt filled FPUF during 260-320 °C.

| <b>Samples</b>   | <b>CO<sub>2</sub></b> | <b>H<sub>2</sub>O</b> | <b>Hydrocarbons</b> | <b>Carbonyl</b> | <b>Aromatic</b> | <b>Ethers</b> | <b>Total</b> |
|------------------|-----------------------|-----------------------|---------------------|-----------------|-----------------|---------------|--------------|
| Pure FPUF        | 536                   | 59                    | 116                 | 509             | 84              | 318           | 1622         |
| FPUF/K-sulphate  | 507                   | 47                    | 44                  | 306             | 28              | 102           | 1034         |
| FPUF/K-carbonate | 1626                  | 93                    | 77                  | 311             | 64              | 83            | 2254         |
| FPUF/K-formate   | 1912                  | 103                   | 153                 | 436             | 104             | 174           | 2882         |
| FPUF/K-acetate   | 1341                  | 50                    | 42                  | 100             | 37              | 22            | 1592         |
| FPUF/K-oxalate   | 607                   | 69                    | 57                  | 88              | 45              | 42            | 908          |
| FPUF/K-succinate | 1156                  | 40                    | 69                  | 177             | 114             | 45            | 1601         |
| FPUF/K-malate    | 1762                  | 136                   | 176                 | 711             | 118             | 359           | 3262         |
| FPUF/K-tartrate  | 1144                  | 34                    | 27                  | 87              | 42              | 20            | 1354         |

**Supplementary Table 11.** Activation energy  $E_a$  and  $R^2$  of pure FPUF, FPUF/K-formate, and FPUF/K-malate sludge at different conversion degrees.

| <b>KAS<sup>a</sup></b> |                  |        |                |        |                |        |
|------------------------|------------------|--------|----------------|--------|----------------|--------|
| $\alpha^c$             | Pure FPUF        |        | FPUF/K-formate |        | FPUF/K-malate  |        |
|                        | $E_a^d$ (kJ/mol) | $R^2$  | $E_a$ (kJ/mol) | $R^2$  | $E_a$ (kJ/mol) | $R^2$  |
| 0.05                   | 79.68            | 0.8412 | 59.34          | 0.9447 | 54.86          | 0.7483 |
| 0.10                   | 87.95            | 0.9783 | 68.94          | 0.9551 | 73.50          | 0.9792 |
| 0.20                   | 95.06            | 0.9998 | 55.79          | 0.9936 | 70.94          | 0.9450 |
| 0.30                   | 189.70           | 0.8204 | 52.81          | 0.9803 | 67.59          | 0.9409 |
| 0.40                   | 309.97           | 0.9043 | 51.75          | 0.9733 | 65.77          | 0.9432 |
| 0.50                   | 216.61           | 0.7570 | 51.80          | 0.9673 | 64.58          | 0.9449 |
| 0.60                   | 271.64           | 0.7665 | 51.29          | 0.9547 | 62.99          | 0.9394 |
| 0.70                   | 445.51           | 0.8440 | 49.68          | 0.9395 | 61.52          | 0.9445 |
| 0.80                   | 173.38           | 0.9940 | 96.19          | 0.9693 | 45.94          | 0.9838 |
| 0.90                   | 132.81           | 0.9761 | 85.24          | 0.8599 | 48.02          | 0.8609 |
| 0.95                   | 122.36           | 0.9500 | 82.43          | 0.9319 | 61.33          | 0.8042 |
| <b>FWO<sup>b</sup></b> |                  |        |                |        |                |        |
| $\alpha$               | Pure FPUF        |        | FPUF/K-formate |        | FPUF/K-malate  |        |
|                        | $E_a$ (kJ/mol)   | $R^2$  | $E_a$ (kJ/mol) | $R^2$  | $E_a$ (kJ/mol) | $R^2$  |
| 0.05                   | 84.61            | 0.8688 | 64.79          | 0.9580 | 60.64          | 0.8013 |
| 0.10                   | 92.72            | 0.9824 | 74.38          | 0.9651 | 78.70          | 0.9837 |
| 0.20                   | 99.74            | 0.9998 | 62.04          | 0.9952 | 76.42          | 0.9565 |
| 0.30                   | 190.09           | 0.8354 | 59.27          | 0.9855 | 73.33          | 0.9539 |
| 0.40                   | 304.89           | 0.9101 | 58.31          | 0.9805 | 71.65          | 0.9561 |
| 0.50                   | 216.43           | 0.7748 | 58.40          | 0.9761 | 70.56          | 0.9576 |
| 0.60                   | 268.97           | 0.7807 | 57.94          | 0.9670 | 69.09          | 0.9537 |
| 0.70                   | 434.56           | 0.8505 | 56.45          | 0.9563 | 67.72          | 0.9580 |
| 0.80                   | 177.04           | 0.9948 | 100.89         | 0.9748 | 53.05          | 0.9894 |
| 0.90                   | 138.99           | 0.9803 | 92.57          | 0.8894 | 57.05          | 0.9071 |
| 0.95                   | 128.05           | 0.9595 | 89.57          | 0.9486 | 69.58          | 0.8445 |
| <b>Average</b>         |                  |        |                |        |                |        |
| $\alpha$               | Pure FPUF        |        | FPUF/K-formate |        | FPUF/K-malate  |        |
|                        | $E_a$ (kJ/mol)   | $R^2$  | $E_a$ (kJ/mol) | $R^2$  | $E_a$ (kJ/mol) | $R^2$  |
| 0.05                   | 82.15            | -      | 62.07          | -      | 57.75          | -      |
| 0.10                   | 90.34            | -      | 71.66          | -      | 76.10          | -      |
| 0.20                   | 97.40            | -      | 58.92          | -      | 73.68          | -      |
| 0.30                   | 189.90           | -      | 56.04          | -      | 70.46          | -      |
| 0.40                   | 307.43           | -      | 55.03          | -      | 68.71          | -      |
| 0.50                   | 216.52           | -      | 55.10          | -      | 67.57          | -      |
| 0.60                   | 270.31           | -      | 54.62          | -      | 66.04          | -      |
| 0.70                   | 440.04           | -      | 53.07          | -      | 64.62          | -      |
| 0.80                   | 175.21           | -      | 98.54          | -      | 49.50          | -      |
| 0.90                   | 135.90           | -      | 88.91          | -      | 52.54          | -      |
| 0.95                   | 125.21           | -      | 86.00          | -      | 65.46          | -      |

a) KAS: Kissinger-Akahira-Sunose model

b) FWO: Flynn-Wall-Ozawa model

c)  $\alpha$ : Conversion rate

d)  $E_a$ : The apparent activation energy of different conversion rates

e)  $R^2$ : The correlation coefficient of the linear relationship

**Supplementary Table 12.** Mechanical properties of pure FPUF, FPUF/K-formate, and FPUF/K-malate

| <b>Samples</b>                            | <b>Pure FPUF</b> | <b>FPUF/K-formate</b> | <b>FPUF/K-malate</b> |
|-------------------------------------------|------------------|-----------------------|----------------------|
| Density (kg/m <sup>3</sup> )              | 59 ± 0.5         | 59 ± 0.2              | 61 ± 0.2             |
| Tensile strength (kPa)                    | 48 ± 6           | 68 ± 4                | 57 ± 4               |
| Elongation at break (%)                   | 105 ± 5          | 157 ± 7               | 115 ± 6              |
| Tensile toughness (kJ/m <sup>2</sup> )    | 25 ± 3           | 52 ± 5                | 35 ± 4               |
| Compressive strength (kPa)                | 4.9              | 3.5                   | 4.9                  |
| Compressive strength recovery rate (%)    | 94.9             | 90.3                  | 96.5                 |
| Compressive deformation recovery rate (%) | 99.6             | 90.0                  | 93.0                 |

---

## Supplementary References

1. Zeng, F.R. et al. Recyclable Biophenolic Nanospheres for Sustainable and Durable Multifunctional Applications in Thermosets. *ACS Materials Letters* **5**, 1692-1702 (2023).
2. Zeng, F.R. et al. Molecular-micron multiscale toughening and flame retarding for polyurethane foams. *Chemical Engineering Journal* **454**, 140023 (2023).
3. Rao, W. et al. A reactive phosphorus-containing polyol incorporated into flexible polyurethane foam: Self-extinguishing behavior and mechanism. *Polymer Degradation and Stability* **153**, 192-200 (2018).
4. Chan, Y.Y., Ma, C., Zhou, F., Hu, Y. & Scharrel, B. Flame retardant flexible polyurethane foams based on phosphorous soybean-oil polyol and expandable graphite. *Polymer Degradation and Stability* **191**, 109656 (2021).
5. Zhou, F. et al. Synthesis of a novel liquid phosphorus-containing flame retardant for flexible polyurethane foam: Combustion behaviors and thermal properties. *Polymer Degradation and Stability* **171**, 109029 (2020).
6. Ma, C. et al. Fabrication of flexible polyurethane/phosphorus interpenetrating polymer network (IPN) foam for enhanced thermal stability, flame retardancy and mechanical properties. *Polymer Degradation and Stability* **189**, 109602 (2021).
7. Yin, Z., Chu, F., Yu, B., Wang, B. & Hu, Y. Hierarchical Ti(3)C(2)T(x)@BPA@PCL for flexible polyurethane foam capable of anti-compression, self-extinguishing and flame-retardant. *J Colloid Interface Sci* **626**, 208-220 (2022).
8. Ma, S.C. et al. Effects of novel phosphorus-nitrogen-containing DOPO derivative salts on mechanical properties, thermal stability and flame retardancy of flexible polyurethane foam. *Polymer Degradation and Stability* **177**, 109160 (2020).
9. Zhang, S. et al. The improvement of fire safety performance of flexible polyurethane foam by Highly-efficient P-N-S elemental hybrid synergistic flame retardant. *J Colloid Interface Sci* **606**, 768-783 (2022).
10. Rao, W.H. et al. Flame-Retardant Flexible Polyurethane Foams with Highly Efficient Melamine Salt. *Industrial & Engineering Chemistry Research* **56**, 7112-7119 (2017).
11. Rao, W. et al. Persistently flame-retardant flexible polyurethane foams by a novel phosphorus-containing polyol. *Chemical Engineering Journal* **343**, 198-206 (2018).
12. Zhang, S.H. et al. High-performance flexible polyurethane from renewable castor oil: Preparation, properties

- 
- and mechanism. *Composites Part A: Applied Science and Manufacturing* **159**, 107034 (2022).
13. Wang, C.-Q., Lv, H.-N., Sun, J. & Cai, Z.-S. Flame retardant and thermal decomposition properties of flexible polyurethane foams filled with several halogen-free flame retardants. *Polymer Engineering & Science* **54**, 2497-2507 (2014).
  14. Gómez Fernández, S., Günther, M., Schartel, B., Corcuera, M.A. & Eceiza, A. Impact of the combined use of layered double hydroxides, lignin and phosphorous polyol on the fire behavior of flexible polyurethane foams. *Industrial Crops and Products* **125**, 346-359 (2018).
  15. Zhou, Y. et al. MOF-derived 3D petal-like CoNi-LDH array cooperates with MXene to effectively inhibit fire and toxic smoke hazards of FPUF. *Chemosphere* **297**, 134134 (2022).
  16. Yin, Z. et al. Functionalizing Ti<sub>3</sub>C<sub>2</sub>T<sub>x</sub> for enhancing fire resistance and reducing toxic gases of flexible polyurethane foam composites with reinforced mechanical properties. *Journal of Colloid and Interface Science* **607**, 1300-1312 (2022).
  17. Jia, P. et al. Design of copper salt@graphene nanohybrids to accomplish excellent resilience and superior fire safety for flexible polyurethane foam. *Journal of Colloid and Interface Science* **606**, 1205-1218 (2022).
  18. Yu, X. et al. Effects of graphene nanosheets decorated by cerium stannate on the enhancement of flame retardancy and mechanical performances of flexible polyurethane foam composites. *Polymers for Advanced Technologies* **33**, 290-302 (2021).
