# Supplementary material for: Catalytic polymer self-cleavage for CO2 generation before combustion empowers materials with fire safety
Source: PubMed Central journal article supplement (PMC10978860; doi:10.1038/s41467-024-46756-0), 2024-03-28
Supplement: 41467_2024_46756_MOESM3_ESM.pdf [file 41467_2024_46756_MOESM3_ESM.pdf]

### **Description of Additional Supplementary Files**

File Name: Supplementary Movie 1

Description: K-formate filled FPUF(oxygen index 26.5%)

File Name: Supplementary Movie 2

Description: K-malate filled FPUF (oxygen index 26.0%)

File Name: Supplementary Movie 3

Description: K-formate filled FPUF(oxygen index 30.5%)

File Name: Supplementary Movie 4

Description: Horizontal burning test of pure FPUF

File Name: Supplementary Movie 5

Description: Horizontal burning test of EG filled FPUF

File Name: Supplementary Movie 6

Description: Horizontal burning test of TCPP filled FPUF

File Name: Supplementary Movie 7

Description: Horizontal burning test of K-formate filled FPUF

File Name: Supplementary Movie 8

Description: Horizontal burning test of K-malate filled FPUF
